# Supplementary material for: PTB-Associated Splicing Factor (PSF) Is a PPARγ-Binding Protein and Growth Regulator of Colon Cancer Cells
Source: PLoS One. 2013 Mar 13;8(3):e58749. doi: 10.1371/journal.pone.0058749 (PMC3596311; doi:10.1371/journal.pone.0058749)
Supplement: Table S1 — MALDI-TOF MS analysis for PSF siRNA transfected HT-29 and DLD-1 cells. Analyses were performed using the AB SCIEX TOF/TOF™ 5800 System (AB SCIEX, Foster City, CA, USA). Protein identification was performed through ProteinPilot™ software (AB Sciex, Framingham, MA, USA) using the UniProt database. We identified 25 distinct proteins whose levels were significantly altered following PSF knockdown in both cell lines. (XLS) [file pone.0058749.s002.xls]

## Sheet: Sheet1
DLD-1(WT)	Protein name	Score	Function
	Upregulated protein
B3KSC3	cDNA FLJ35987 fis clone TESTI2014269 highly similar to D 3 phosphoglycerate dehydrogenase EC 1 1	2770.29
H7C3M2	60S ribosomal protein L3 Fragment OS Homo sapiens GN RPL3 PE 4 SV 1	2240.68
P30101	Protein disulfide isomerase A3 OS Homo sapiens GN PDIA3 PE 1 SV 4	5523.05
Q99879	Histone H2B type 1 M OS Homo sapiens GN HIST1H2BM PE 1 SV 3	41782.2
B3KQG6	cDNA FLJ90427 fis clone NT2RP3000481 highly similar to Importin 7 OS Homo sapiens PE 2 SV 1	1319.12
G1UI32	Pyridoxal kinase Fragment OS Homo sapiens GN PDXK PE 2 SV 1	944.12
Q5T6W2	Heterogeneous nuclear ribonucleoprotein K Fragment OS Homo sapiens GN HNRNPK PE 2 SV 1	5634.4
E9PSH5	Heat shock cognate 71 kDa protein OS Homo sapiens GN HSPA8 PE 3 SV 1	19164.7
P07741	Adenine phosphoribosyltransferase OS Homo sapiens GN APRT PE 1 SV 2	1617.91
Q6PIX2	SFPQ protein Fragment OS Homo sapiens GN SFPQ PE 2 SV 1	640.5
Q2F838	Eukaryotic translation elongation factor 1 gamma Fragment OS Homo sapiens PE 2 SV 1	1454.95
O14660	GARS AIRS GART Fragment OS Homo sapiens PE 2 SV 1	1381.28
Q53SW9	Putative uncharacterized protein PTD004 Fragment OS Homo sapiens GN PTD004 PE 2 SV 1	1368.1
B4DDE4	Uncharacterized protein OS Homo sapiens GN UBA1 PE 2 SV 1	373.03
P30050	60S ribosomal protein L12 OS Homo sapiens GN RPL12 PE 1 SV 1	1592.68
G3V2B8	Methylenetetrahydrofolate dehydrogenase OS Homo sapiens GN MTHFD1 PE 3 SV 1	559.35
P00338	L lactate dehydrogenase A chain OS Homo sapiens GN LDHA PE 1 SV 2	3636.16
Q53HK9	Ribosomal protein P0 variant Fragment OS Homo sapiens PE 2 SV 1	4538.4
B4DN06	Ribosomal protein L3 isoform CRA i OS Homo sapiens GN RPL3 PE 2 SV 1	1768.31
B4DUK7	cDNA FLJ59991 highly similar to Elongation factor 1 gamma OS Homo sapiens PE 2 SV 1	1612.84
G3V1U9	Tubulin alpha 1A chain OS Homo sapiens GN TUBA1A PE 3 SV 1	156435
O95994	Anterior gradient protein 2 homolog OS Homo sapiens GN AGR2 PE 1 SV 1	4390.19
A4UCS8	Enolase Fragment OS Homo sapiens PE 2 SV 1	1835.53
B9VP19	60 kDa chaperonin Fragment OS Homo sapiens GN HSPD1 PE 4 SV 1	2852
E4W6B6	RPL27 NME2 fusion protein Fragment OS Homo sapiens GN RPL27 PE 2 SV 1	967.62
H3BT25	Protein PKM Fragment OS Homo sapiens GN PKM PE 4 SV 1	29233
DLD-1(siRNA PSF)	Upregulated protein
B4DKM5	Voltage dependent anion selective channel protein 2 OS Homo sapiens GN VDAC2 PE 2 SV 1	1083.56	Apoptosis
C9JEV8	Tubulin alpha 4A chain Fragment OS Homo sapiens GN TUBA4A PE 3 SV 1	2643.1	Major constituent of microtubules
B4E388	cDNA FLJ54407 highly similar to Heat shock 70 kDa protein 1 OS Homo sapiens PE 2 SV 1	5044.79	Molecular chaperone
Q14568	Putative heat shock protein HSP 90 alpha A2 OS Homo sapiens GN HSP90AA2 PE 1 SV 2	5588.98	Molecular chaperone
Q5SRT3	Chloride intracellular channel 1 OS Homo sapiens GN CLIC1 PE 2 SV 2	1362.26	Cell cycle
E9PHF0	Filamin A OS Homo sapiens GN FLNA PE 4 SV 2	4998.13	Anchors various transmembrane proteins
F8VUJ7	Tubulin beta chain OS Homo sapiens GN TUBB PE 3 SV 1	22877.5	Major constituent of microtubules
B7Z597	cDNA FLJ54373 highly similar to 60 kDa heat shock protein mitochondrial OS Homo sapiens PE 2 SV 1	15640.9	Molecular chaperone
B0AZS6	14 3 3 protein zeta delta OS Homo sapiens GN YWHAZ PE 2 SV 1	20889.7	Adapter protein
P52565	Rho GDP dissociation inhibitor 1 OS Homo sapiens GN ARHGDIA PE 1 SV 3	2587.8	Regulates the GDP/GTP exchange reaction of the Rho proteins
Q8WXF1-2	Isoform 2 of Paraspeckle component 1 OS Homo sapiens GN PSPC1	1009.38	Interacts with SFPQ
F5H7Y1	T complex protein 1 subunit alpha Fragment OS Homo sapiens GN TCP1 PE 4 SV 1	945.97	Molecular chaperone
D6RCA8	Annexin Fragment OS Homo sapiens GN ANXA3 PE 3 SV 1	1809.23	Apoptosis
P35527	Keratin type I cytoskeletal 9 Cytokeratin 9 K9	325.71
C4TNW5	Protein phosphatase 1 catalytic subunit alpha Fragment OS Homo sapiens GN PPP1CA PE 4 SV 1	19585.7
H7C2U0	T complex protein 1 subunit theta Fragment OS Homo sapiens GN CCT8 PE 4 SV 1	939.29	Molecular chaperone
Q14666	Radiated keratinocyte mRNA 266 keratin related protein Fragment OS Homo sapiens PE 2 SV 1	1090.58
E7EUT4	Glyceraldehyde 3 phosphate dehydrogenase OS Homo sapiens GN GAPDH PE 3 SV 1	45513.8	Class of phosphatases known as protein serine/ threonine phosphatases
Q60FE2	MYH9 variant protein OS Homo sapiens GN MYH9 PE 2 SV 1	387.19
F8VU64	Keratin type II cytoskeletal 8 OS Homo sapiens GN KRT8 PE 4 SV 1	47943.8
P22626	Heterogeneous nuclear ribonucleoproteins A2 B1 OS Homo sapiens GN HNRNPA2B1 PE 1 SV 2	588	Involved with pre-mRNA processing.
B4DUI5	Triosephosphate isomerase OS Homo sapiens PE 2 SV 1	6447.71	Plays an important role in glycolysis and is essential for efficient energy production
Q9NQ81	Uridine diphospho glucose dehydrogenase Fragment OS Homo sapiens GN GDH PE 2 SV 1	1353
D6RA82	Annexin OS Homo sapiens GN ANXA3 PE 3 SV 1	1752.21	Apoptosis
P25705	ATP synthase subunit alpha mitochondrial OS Homo sapiens GN ATP5A1 PE 1 SV 1	3177.87	Mitochondrial membrane ATP synthase

## Sheet: Sheet2
HT-29(WT)			Function
E2DRY6	Enolase OS Homo sapiens PE 2 SV 1	8786.61
Q2Q9B7	Glucose 6 phosphate 1 dehydrogenase Fragment OS Homo sapiens GN G6PD PE 2 SV 1	393.18
H0YDG0	Puromycin sensitive aminopeptidase Fragment OS Homo sapiens GN NPEPPS PE 4 SV 1	470.66
B7ZW15	Putative uncharacterized protein OS Homo sapiens PE 2 SV 1	802.1
F1BXA6	Beta actin Fragment OS Homo sapiens PE 2 SV 1	39773.6
B2R8Y4	cDNA FLJ94117 highly similar to Homo sapiens actinin alpha 3 ACTN3 mRNA OS Homo sapiens PE 2 S	466.25
Q9NQS8	Ribosomal protein S3 Fragment OS Homo sapiens GN RPS3 PE 2 SV 1	1674.74
E9PNE6	Heat shock cognate 71 kDa protein OS Homo sapiens GN HSPA8 PE 3 SV 1	20747
E7EMV8	Eukaryotic initiation factor 4A II Fragment OS Homo sapiens GN EIF4A2 PE 4 SV 1	3301.76
Q6LC01	MRNA encoding beta tubulin from clone D beta 1 Fragment OS Homo sapiens PE 2 SV 1	27897.1
B4DMU8	cDNA FLJ53063 highly similar to Tubulin beta 7 chain OS Homo sapiens PE 2 SV 1	13135.5
Q5I6Y6	Lamin A C transcript variant 1 OS Homo sapiens GN LMNA PE 2 SV 1	5063.15
Q9BV28	TUBB3 protein Fragment OS Homo sapiens GN TUBB3 PE 2 SV 2	22586
H3BQ34	Pyruvate kinase OS Homo sapiens GN PKM PE 3 SV 1	14940.8
B7Z645	Synaptotagmin binding cytoplasmic RNA interacting protein isoform CRA b OS Homo sapiens GN SYNCRIP	893.33
F6UXX1	Heterogeneous nuclear ribonucleoprotein Q Fragment OS Homo sapiens GN SYNCRIP PE 4 SV 1	1037.77
H7C5L4	Filamin B Fragment OS Homo sapiens GN FLNB PE 4 SV 1	949.78
P63104	14 3 3 protein zeta delta OS Homo sapiens GN YWHAZ PE 1 SV 1	19411.7
B4DNX1	cDNA FLJ53752 highly similar to Heat shock 70 kDa protein 1 OS Homo sapiens PE 2 SV 1	8086.75
F5GWP8	Junction plakoglobin OS Homo sapiens GN JUP PE 3 SV 1	116.83
HT-29(siRNA PSF)
P58876	Histone H2B type 1 D OS Homo sapiens GN HIST1H2BD PE 1 SV 2	36545.3	Core component of nucleosome
E7ENQ5	Annexin OS Homo sapiens GN ANXA5 PE 3 SV 1	13591.6	Apoptosis
P00338-5	Isoform 5 of L lactate dehydrogenase A chain OS Homo sapiens GN LDHA	1251.97	Prevents the aggregation of denatured proteins in cells under severe stress
Q92598-2	Isoform Beta of Heat shock protein 105 kDa OS Homo sapiens GN HSPH1	2358.65	Prevents the aggregation of denatured proteins in cells under severe stress
H0YJP3	Tryptophan tRNA ligase cytoplasmic Fragment OS Homo sapiens GN WARS PE 4 SV 1	2208.32	Belongs to the family of ligases
P23381-2	Isoform 2 of Tryptophan tRNA ligase cytoplasmic OS Homo sapiens GN WARS	2390	Belongs to the family of ligases
G3V2W4	Alpha actinin 1 Fragment OS Homo sapiens GN ACTN1 PE 4 SV 1	2188.44	Cytoskeletal proteins
Q15181	Inorganic pyrophosphatase OS Homo sapiens GN PPA1 PE 1 SV 2	1108.76	The hydrolysis of inorganic pyrophosphate
P20591-2	Isoform 2 of Interferon induced GTP binding protein Mx1 OS Homo sapiens GN MX1	1841.01
Q8TBA7	HSP90AA1 protein Fragment OS Homo sapiens GN HSP90AA1 PE 2 SV 2	17728.3
Q8WXF1-2	Isoform 2 of Paraspeckle component 1 OS Homo sapiens GN PSPC1	436.15	Interacts with SFPQ
Q04917	14 3 3 protein eta OS Homo sapiens GN YWHAH PE 1 SV 4	2768.05	Adapter protein
P61978	Heterogeneous nuclear ribonucleoprotein K OS Homo sapiens GN HNRNPK PE 1 SV 1	6489.04	Induction of apoptosis, but not cell cycle arrest.
P06748-3	Isoform 3 of Nucleophosmin OS Homo sapiens GN NPM1	11021.9	Involved in diverse cellular processes
B4DF70	cDNA FLJ60461 highly similar to Peroxiredoxin 2 EC 1 11 1 15 OS Homo sapiens PE 2 SV 1	651.24
P29373	Cellular retinoic acid binding protein 2 OS Homo sapiens GN CRABP2 PE 1 SV 2	847.04	Transports retinoic acid to the nucleus.
Q9NZS6	Elongation factor 1 alpha Fragment OS Homo sapiens PE 2 SV 1	10831.2	Promotes the GTP-dependent binding of aminoacyl-tRNA to the A-site of ribosomes
Q53G85	Elongation factor 1 alpha Fragment OS Homo sapiens PE 2 SV 1	24805.7	Promotes the GTP-dependent binding of aminoacyl-tRNA to the A-site of ribosomes
Q13501	Sequestosome 1 OS Homo sapiens GN SQSTM1 PE 1 SV 1	1955.94	Involved in cell differentiation, apoptosis,
Q5JP53	Tubulin beta chain OS Homo sapiens GN TUBB PE 3 SV 1	18699.4	Major constituent of microtubules
B4DMJ2	Uncharacterized protein OS Homo sapiens GN RPL4 PE 2 SV 1	1246.55	Ribonucleoprotein
C9JH19	Cathepsin D Fragment OS Homo sapiens GN CTSD PE 3 SV 1	2692.55
F8VX09	Tubulin alpha 1B chain Fragment OS Homo sapiens GN TUBA1B PE 4 SV 1	124465	Major constituent of microtubules
B3KQT9	Protein disulfide isomerase A3 OS Homo sapiens GN PDIA3 PE 2 SV 1	6929.54
H3BT25	Protein PKM Fragment OS Homo sapiens GN PKM PE 4 SV 1	15931.3

## Sheet: Sheet3
DLD-1(siRNA PSF)	Upregulated protein
Acssession No.	Protein Name		Function
B4DKM5	Voltage dependent anion selective channel protein 2 OS Homo sapiens GN VDAC2 PE 2 SV 1	1083.56	Apoptosis
C9JEV8	Tubulin alpha 4A chain Fragment OS Homo sapiens GN TUBA4A PE 3 SV 1	2643.1	Major constituent of microtubules
B4E388	cDNA FLJ54407 highly similar to Heat shock 70 kDa protein 1 OS Homo sapiens PE 2 SV 1	5044.79	Molecular chaperone
Q14568	Putative heat shock protein HSP 90 alpha A2 OS Homo sapiens GN HSP90AA2 PE 1 SV 2	5588.98	Molecular chaperone
Q5SRT3	Chloride intracellular channel 1 OS Homo sapiens GN CLIC1 PE 2 SV 2	1362.26	Cell cycle
E9PHF0	Filamin A OS Homo sapiens GN FLNA PE 4 SV 2	4998.13	Anchors various transmembrane proteins
F8VUJ7	Tubulin beta chain OS Homo sapiens GN TUBB PE 3 SV 1	22877.5	Major constituent of microtubules
B7Z597	cDNA FLJ54373 highly similar to 60 kDa heat shock protein mitochondrial OS Homo sapiens PE 2 SV 1	15640.9	Molecular chaperone
B0AZS6	14 3 3 protein zeta delta OS Homo sapiens GN YWHAZ PE 2 SV 1	20889.7	Adapter protein
P52565	Rho GDP dissociation inhibitor 1 OS Homo sapiens GN ARHGDIA PE 1 SV 3	2587.8	Regulates the GDP/GTP exchange reaction of the Rho proteins
Q8WXF1-2	Isoform 2 of Paraspeckle component 1 OS Homo sapiens GN PSPC1	1009.38	Interacts with SFPQ
F5H7Y1	T complex protein 1 subunit alpha Fragment OS Homo sapiens GN TCP1 PE 4 SV 1	945.97	Molecular chaperone
D6RCA8	Annexin Fragment OS Homo sapiens GN ANXA3 PE 3 SV 1	1809.23	Apoptosis
P35527	Keratin type I cytoskeletal 9 Cytokeratin 9 K9	325.71
C4TNW5	Protein phosphatase 1 catalytic subunit alpha Fragment OS Homo sapiens GN PPP1CA PE 4 SV 1	19585.7
H7C2U0	T complex protein 1 subunit theta Fragment OS Homo sapiens GN CCT8 PE 4 SV 1	939.29	Molecular chaperone
Q14666	Radiated keratinocyte mRNA 266 keratin related protein Fragment OS Homo sapiens PE 2 SV 1	1090.58
E7EUT4	Glyceraldehyde 3 phosphate dehydrogenase OS Homo sapiens GN GAPDH PE 3 SV 1	45513.8	Class of phosphatases known as protein serine/ threonine phosphatases
Q60FE2	MYH9 variant protein OS Homo sapiens GN MYH9 PE 2 SV 1	387.19
F8VU64	Keratin type II cytoskeletal 8 OS Homo sapiens GN KRT8 PE 4 SV 1	47943.8
P22626	Heterogeneous nuclear ribonucleoproteins A2 B1 OS Homo sapiens GN HNRNPA2B1 PE 1 SV 2	588	Involved with pre-mRNA processing.
B4DUI5	Triosephosphate isomerase OS Homo sapiens PE 2 SV 1	6447.71	Plays an important role in glycolysis and is essential for efficient energy production
Q9NQ81	Uridine diphospho glucose dehydrogenase Fragment OS Homo sapiens GN GDH PE 2 SV 1	1353
D6RA82	Annexin OS Homo sapiens GN ANXA3 PE 3 SV 1	1752.21	Apoptosis
P25705	ATP synthase subunit alpha mitochondrial OS Homo sapiens GN ATP5A1 PE 1 SV 1	3177.87	Mitochondrial membrane ATP synthase
HT-29(siRNA PSF)	Upregulated protein
P58876	Histone H2B type 1 D OS Homo sapiens GN HIST1H2BD PE 1 SV 2	36545.3	Core component of nucleosome
E7ENQ5	Annexin OS Homo sapiens GN ANXA5 PE 3 SV 1	13591.6	Apoptosis
P00338-5	Isoform 5 of L lactate dehydrogenase A chain OS Homo sapiens GN LDHA	1251.97	Prevents the aggregation of denatured proteins in cells under severe stress
Q92598-2	Isoform Beta of Heat shock protein 105 kDa OS Homo sapiens GN HSPH1	2358.65	Prevents the aggregation of denatured proteins in cells under severe stress
H0YJP3	Tryptophan tRNA ligase cytoplasmic Fragment OS Homo sapiens GN WARS PE 4 SV 1	2208.32	Belongs to the family of ligases
P23381-2	Isoform 2 of Tryptophan tRNA ligase cytoplasmic OS Homo sapiens GN WARS	2390	Belongs to the family of ligases
G3V2W4	Alpha actinin 1 Fragment OS Homo sapiens GN ACTN1 PE 4 SV 1	2188.44	Cytoskeletal proteins
Q15181	Inorganic pyrophosphatase OS Homo sapiens GN PPA1 PE 1 SV 2	1108.76	The hydrolysis of inorganic pyrophosphate
P20591-2	Isoform 2 of Interferon induced GTP binding protein Mx1 OS Homo sapiens GN MX1	1841.01
Q8TBA7	HSP90AA1 protein Fragment OS Homo sapiens GN HSP90AA1 PE 2 SV 2	17728.3
Q8WXF1-2	Isoform 2 of Paraspeckle component 1 OS Homo sapiens GN PSPC1	436.15	Interacts with SFPQ
Q04917	14 3 3 protein eta OS Homo sapiens GN YWHAH PE 1 SV 4	2768.05	Adapter protein
P61978	Heterogeneous nuclear ribonucleoprotein K OS Homo sapiens GN HNRNPK PE 1 SV 1	6489.04	Induction of apoptosis, but not cell cycle arrest.
P06748-3	Isoform 3 of Nucleophosmin OS Homo sapiens GN NPM1	11021.9	Involved in diverse cellular processes
B4DF70	cDNA FLJ60461 highly similar to Peroxiredoxin 2 EC 1 11 1 15 OS Homo sapiens PE 2 SV 1	651.24
P29373	Cellular retinoic acid binding protein 2 OS Homo sapiens GN CRABP2 PE 1 SV 2	847.04	Transports retinoic acid to the nucleus.
Q9NZS6	Elongation factor 1 alpha Fragment OS Homo sapiens PE 2 SV 1	10831.2	Promotes the GTP-dependent binding of aminoacyl-tRNA to the A-site of ribosomes
Q53G85	Elongation factor 1 alpha Fragment OS Homo sapiens PE 2 SV 1	24805.7	Promotes the GTP-dependent binding of aminoacyl-tRNA to the A-site of ribosomes
Q13501	Sequestosome 1 OS Homo sapiens GN SQSTM1 PE 1 SV 1	1955.94	Involved in cell differentiation, apoptosis,
Q5JP53	Tubulin beta chain OS Homo sapiens GN TUBB PE 3 SV 1	18699.4	Major constituent of microtubules
B4DMJ2	Uncharacterized protein OS Homo sapiens GN RPL4 PE 2 SV 1	1246.55	Ribonucleoprotein
C9JH19	Cathepsin D Fragment OS Homo sapiens GN CTSD PE 3 SV 1	2692.55
F8VX09	Tubulin alpha 1B chain Fragment OS Homo sapiens GN TUBA1B PE 4 SV 1	124465	Major constituent of microtubules
B3KQT9	Protein disulfide isomerase A3 OS Homo sapiens GN PDIA3 PE 2 SV 1	6929.54
H3BT25	Protein PKM Fragment OS Homo sapiens GN PKM PE 4 SV 1	15931.3

## Sheet: Sheet4
				Acssession No.	Protein Name	Score	Function
		DLD-1 (siRNA PSF)		B4DKM5	Voltage dependent anion selective channel protein 2 OS Homo sapiens GN VDAC2 PE 2 SV 1	1083.56	Involved in the regulation of mitochondrial apoptosis
				C9JEV8	Tubulin alpha 4A chain Fragment OS Homo sapiens GN TUBA4A PE 3 SV 1	2643.1	Major constituent of microtubules
				B4E388	cDNA FLJ54407 highly similar to Heat shock 70 kDa protein 1 OS Homo sapiens PE 2 SV 1	5044.79	Molecular chaperone
				Q14568	Putative heat shock protein HSP 90 alpha A2 OS Homo sapiens GN HSP90AA2 PE 1 SV 2	5588.98	Molecular chaperone
				Q5SRT3	Chloride intracellular channel 1 OS Homo sapiens GN CLIC1 PE 2 SV 2	1362.26	Cell cycle
				E9PHF0	Filamin A OS Homo sapiens GN FLNA PE 4 SV 2	4998.13	Anchors various transmembrane proteins
				F8VUJ7	Tubulin beta chain OS Homo sapiens GN TUBB PE 3 SV 1	22877.5	Major constituent of microtubules
				B7Z597	cDNA FLJ54373 highly similar to 60 kDa heat shock protein mitochondrial OS Homo sapiens PE 2 SV 1	15640.9	Molecular chaperone
				B0AZS6	14 3 3 protein zeta delta OS Homo sapiens GN YWHAZ PE 2 SV 1	20889.7	Adapter protein
				P52565	Rho GDP dissociation inhibitor 1 OS Homo sapiens GN ARHGDIA PE 1 SV 3	2587.8	Regulates the GDP/GTP exchange reaction of the Rho proteins
				Q8WXF1-2	Isoform 2 of Paraspeckle component 1 OS Homo sapiens GN PSPC1	1009.38	Interacts with SFPQ
				F5H7Y1	T complex protein 1 subunit alpha Fragment OS Homo sapiens GN TCP1 PE 4 SV 1	945.97	Molecular chaperone
				D6RCA8	Annexin Fragment OS Homo sapiens GN ANXA3 PE 3 SV 1	1809.23	Apoptosis
				P35527	Keratin type I cytoskeletal 9 Cytokeratin 9 K9	325.71	Plays a role in keratin filament assembly
				C4TNW5	Protein phosphatase 1 catalytic subunit alpha Fragment OS Homo sapiens GN PPP1CA PE 4 SV 1	19585.7	Class of phosphatases known as protein serine/ threonine phosphatases
				H7C2U0	T complex protein 1 subunit theta Fragment OS Homo sapiens GN CCT8 PE 4 SV 1	939.29	Molecular chaperone
				Q14666	Radiated keratinocyte mRNA 266 keratin related protein Fragment OS Homo sapiens PE 2 SV 1	1090.58	Unknown
				E7EUT4	Glyceraldehyde 3 phosphate dehydrogenase OS Homo sapiens GN GAPDH PE 3 SV 1	45513.8	Initiation of apoptosis
				Q60FE2	MYH9 variant protein OS Homo sapiens GN MYH9 PE 2 SV 1	387.19	Plays a role in cell shape
				F8VU64	Keratin type II cytoskeletal 8 OS Homo sapiens GN KRT8 PE 4 SV 1	47943.8	Keratin, cytoskeletal 8
				P22626	Heterogeneous nuclear ribonucleoproteins A2 B1 OS Homo sapiens GN HNRNPA2B1 PE 1 SV 2	588	Involved with pre-mRNA processing.
				B4DUI5	Triosephosphate isomerase OS Homo sapiens PE 2 SV 1	6447.71	Plays an important role in glycolysis and is essential for efficient energy production
				Q9NQ81	Uridine diphospho glucose dehydrogenase Fragment OS Homo sapiens GN GDH PE 2 SV 1	1353	Enzyme belongs to the family of oxidoreductases
				D6RA82	Annexin OS Homo sapiens GN ANXA3 PE 3 SV 1	1752.21	Apoptosis
				P25705	ATP synthase subunit alpha mitochondrial OS Homo sapiens GN ATP5A1 PE 1 SV 1	3177.87	Mitochondrial membrane ATP synthase
		HT-29 (siRNA PSF)		P58876	Histone H2B type 1 D OS Homo sapiens GN HIST1H2BD PE 1 SV 2	36545.3	Core component of nucleosome
				E7ENQ5	Annexin OS Homo sapiens GN ANXA5 PE 3 SV 1	13591.6	Apoptosis
				P00338-5	Isoform 5 of L lactate dehydrogenase A chain OS Homo sapiens GN LDHA	1251.97	Prevents the aggregation of denatured proteins in cells under severe stress
				Q92598-2	Isoform Beta of Heat shock protein 105 kDa OS Homo sapiens GN HSPH1	2358.65	Prevents the aggregation of denatured proteins in cells under severe stress
				H0YJP3	Tryptophan tRNA ligase cytoplasmic Fragment OS Homo sapiens GN WARS PE 4 SV 1	2208.32	Belongs to the family of ligases
				P23381-2	Isoform 2 of Tryptophan tRNA ligase cytoplasmic OS Homo sapiens GN WARS	2390	Belongs to the family of ligases
				G3V2W4	Alpha actinin 1 Fragment OS Homo sapiens GN ACTN1 PE 4 SV 1	2188.44	Cytoskeletal proteins
				Q15181	Inorganic pyrophosphatase OS Homo sapiens GN PPA1 PE 1 SV 2	1108.76	The hydrolysis of inorganic pyrophosphate
				P20591-2	Isoform 2 of Interferon induced GTP binding protein Mx1 OS Homo sapiens GN MX1	1841.01	Dynamin-like GTPase acting as a cell-autonomous
				Q8TBA7	HSP90AA1 protein Fragment OS Homo sapiens GN HSP90AA1 PE 2 SV 2	17728.3	Heat shock protein
				Q8WXF1-2	Isoform 2 of Paraspeckle component 1 OS Homo sapiens GN PSPC1	436.15	Interacts with SFPQ
				Q04917	14 3 3 protein eta OS Homo sapiens GN YWHAH PE 1 SV 4	2768.05	Adapter protein
				P61978	Heterogeneous nuclear ribonucleoprotein K OS Homo sapiens GN HNRNPK PE 1 SV 1	6489.04	Induction of apoptosis, but not cell cycle arrest.
				P06748-3	Isoform 3 of Nucleophosmin OS Homo sapiens GN NPM1	11021.9	Involved in diverse cellular processes
				B4DF70	cDNA FLJ60461 highly similar to Peroxiredoxin 2 EC 1 11 1 15 OS Homo sapiens PE 2 SV 1	651.24	Unknown
				P29373	Cellular retinoic acid binding protein 2 OS Homo sapiens GN CRABP2 PE 1 SV 2	847.04	Transports retinoic acid to the nucleus.
				Q9NZS6	Elongation factor 1 alpha Fragment OS Homo sapiens PE 2 SV 1	10831.2	Promotes the GTP-dependent binding of aminoacyl-tRNA to the A-site of ribosomes
				Q53G85	Elongation factor 1 alpha Fragment OS Homo sapiens PE 2 SV 1	24805.7	Promotes the GTP-dependent binding of aminoacyl-tRNA to the A-site of ribosomes
				Q13501	Sequestosome 1 OS Homo sapiens GN SQSTM1 PE 1 SV 1	1955.94	Involved in cell differentiation, apoptosis,
				Q5JP53	Tubulin beta chain OS Homo sapiens GN TUBB PE 3 SV 1	18699.4	Major constituent of microtubules
				B4DMJ2	Uncharacterized protein OS Homo sapiens GN RPL4 PE 2 SV 1	1246.55	Ribonucleoprotein
				C9JH19	Cathepsin D Fragment OS Homo sapiens GN CTSD PE 3 SV 1	2692.55	Lysosomal aspartyl protease
				F8VX09	Tubulin alpha 1B chain Fragment OS Homo sapiens GN TUBA1B PE 4 SV 1	124465	Major constituent of microtubules
				B3KQT9	Protein disulfide isomerase A3 OS Homo sapiens GN PDIA3 PE 2 SV 1	6929.54	Catalyzes the rearrangement of -S-S bonds in proteins
				H3BT25	Protein PKM Fragment OS Homo sapiens GN PKM PE 4 SV 1	15931.3	Pyruvate kinase isozymes
